# Supplementary material
Source: PubMed Central journal article supplement (PMC9398944)
Supplement: mmc1.pdf [file mmc1.pdf]

## **Vitamin D modulates systemic inflammation in patients with severe COVID-19**

Fatemeh Saheb Sharif-Askari, Shirin Hafezi, Narjes Saheb Sharif-Askari, Hawra Ali Hussain Alsayed, Bushra Mdkhana, Balachandar Selvakumar, Mohamad-Hani Temsah, Basema Saddik, Fatme Al Anouti, Rabih Halwani

**Supplementary Table 1.** List of primer sequences used in qRT-PCR

| <b>Genes</b>                  | <b>Forward primer sequence (5'-3')</b> | <b>Reverse primer sequence (5'-3')</b> |
|-------------------------------|----------------------------------------|----------------------------------------|
| <b>IL-6</b>                   | GAAAGCAGCAAAGAGGCAC                    | GCACAGCTCTGGCTTGTTC                    |
| <b>IL-17</b>                  | CGGACTGTGATGGTCAACCTGA                 | GCACTTTGCCTCCCAGATCACA                 |
| <b>IL-1<math>\beta</math></b> | CCACAGACCTTCCAGGAGAATG                 | GTGCAGTTCAGTGATCGTACAGG                |
| <b>TNF<math>\alpha</math></b> | GGCGCCACCACGCTCTTC                     | CTGGGCCAGAGGGCTGATTAG                  |
| <b>18s</b>                    | TGACTCAACACGGGAAACC                    | TCGCTCCACCAACTAAGAAC                   |
