# Supplementary material
Source: PubMed Central journal article supplement (PMC9398944)
Supplement: mmc2.pdf [file mmc2.pdf]

# Vitamin D modulates systemic inflammation in patients with severe COVID-19

Fatemeh Saheb Sharif-Askari, Shirin Hafezi, Narjes Saheb Sharif-Askari, Hawra Ali Hussain Alsayed, Bushra Mdkhana, Balachandar Selvakumar, Mohamad-Hani Temsah, Basema Saddik, Fatme Al Anouti, Rabih Halwani

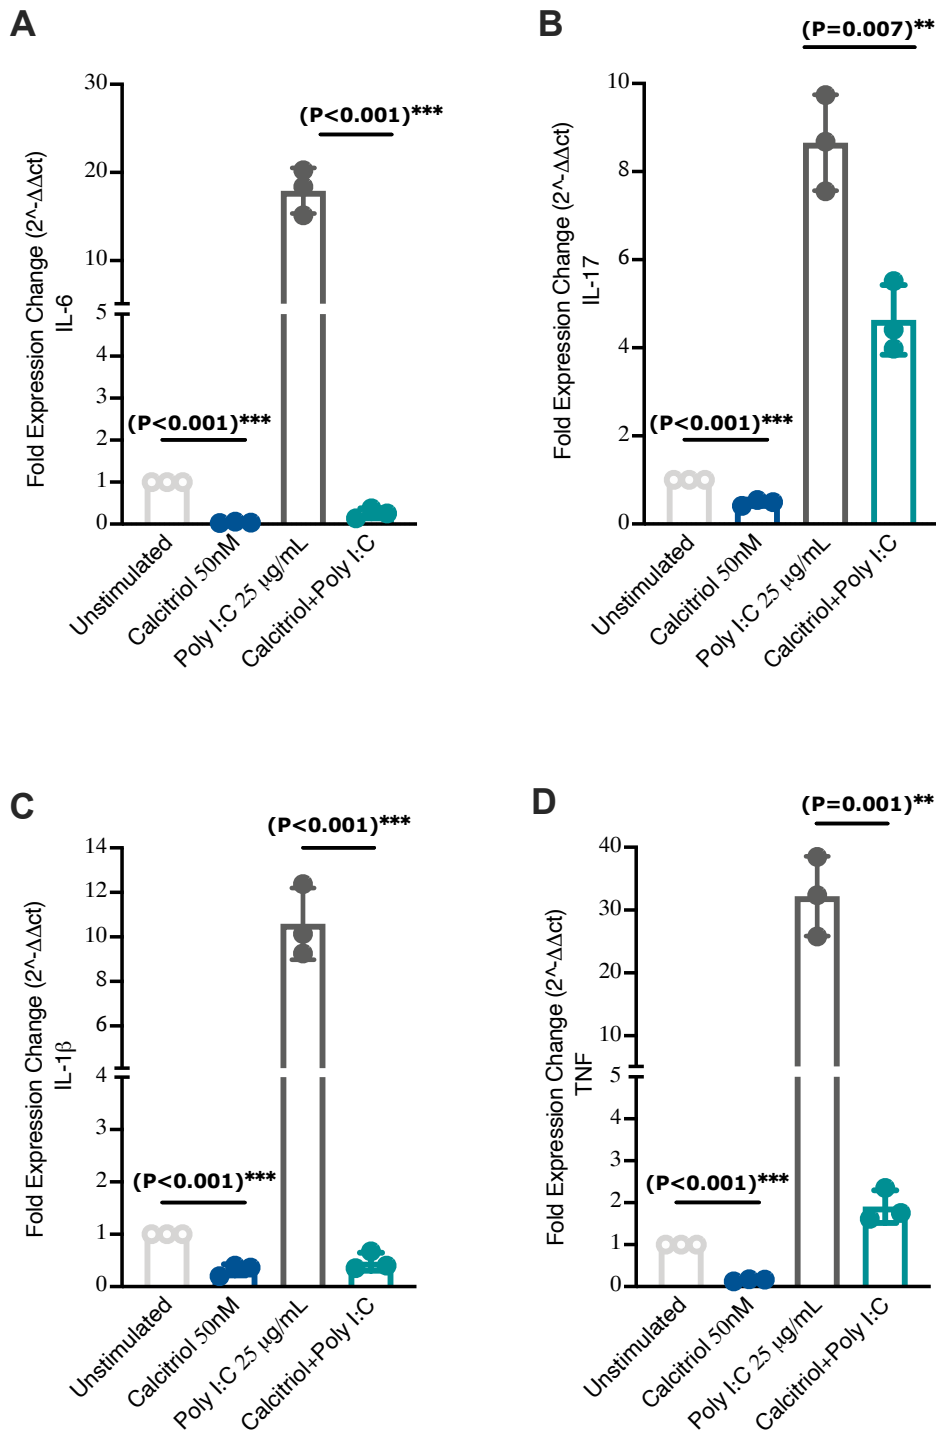

**Supplementary Figure 1.** The mRNA expression levels of IL-6, IL-17, IL-1 $\beta$ , and TNF $\alpha$  proinflammatory cytokines in VitD treated PBMCs and VitD treated Poly I:C-stimulated PBMCs. PBMCs were isolated from blood of healthy donors (n=3). Peripheral blood mononuclear cell; PBMC, Statistical tests; comparison was done using unpaired t-test or Mann-Whitney U test, depending on the skewness of the data. P value of <0.05 was considered significant.

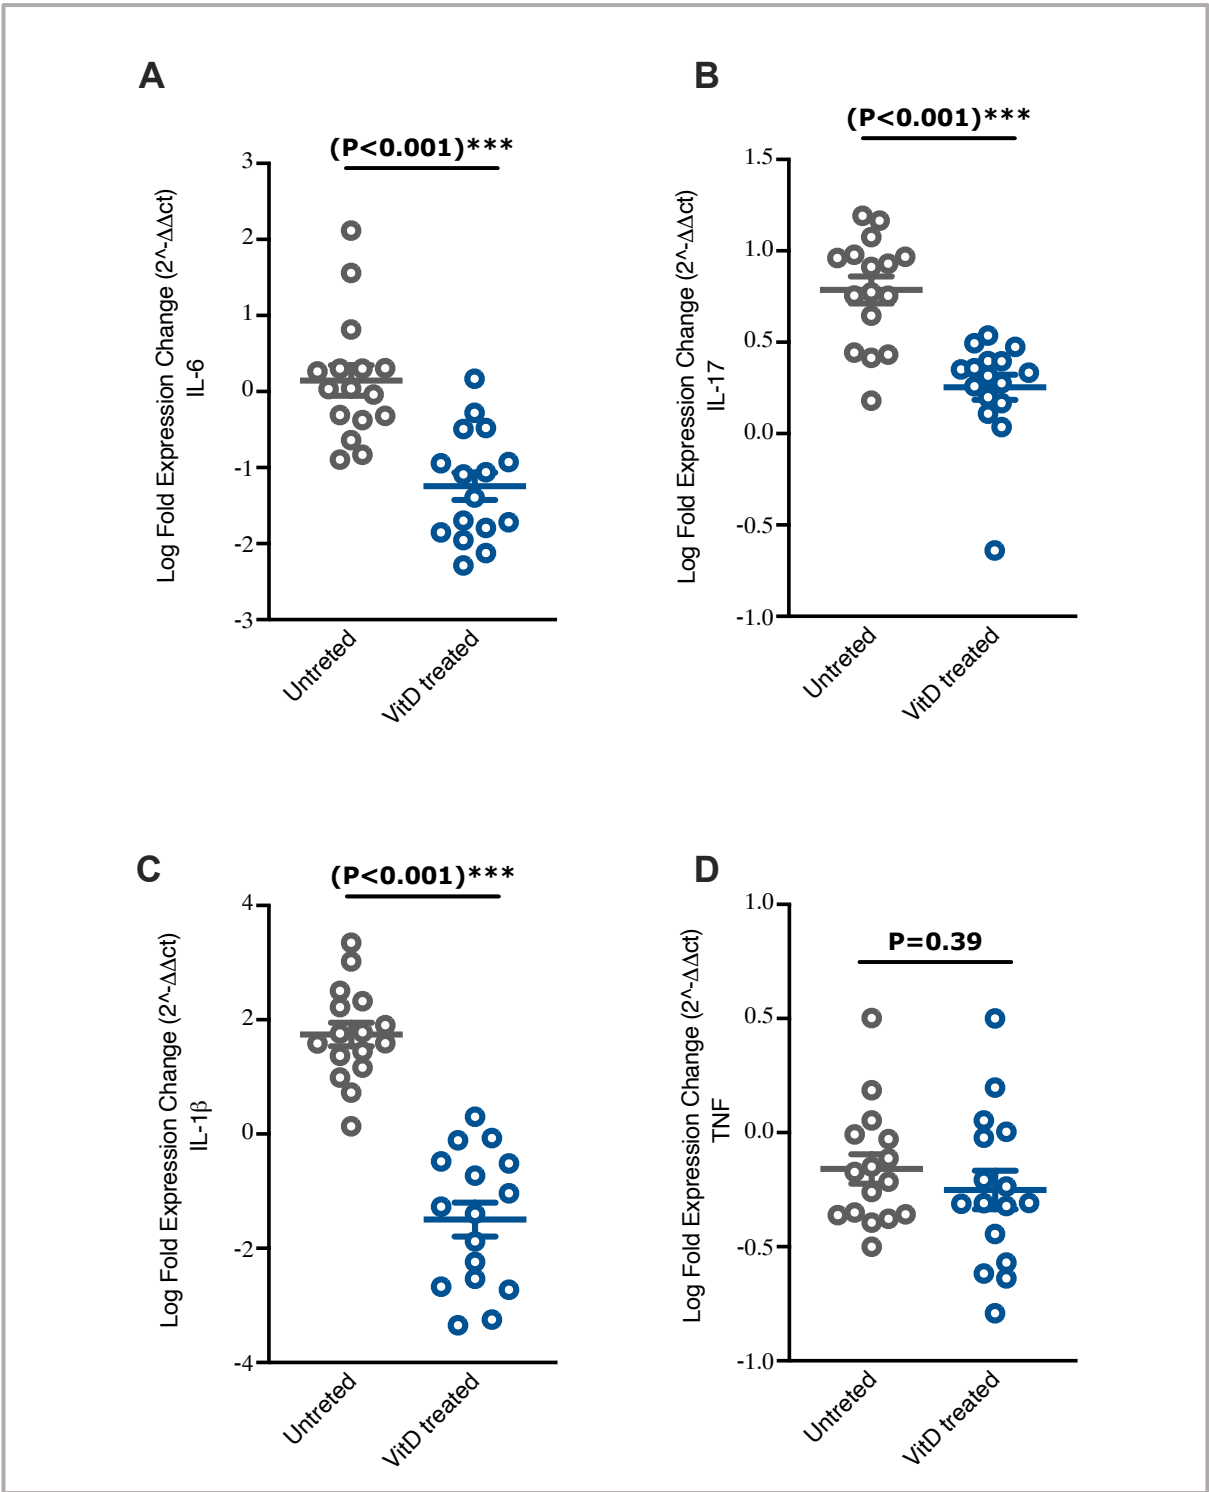

**Supplementary Figure 2.** The mRNA expression levels of IL-6, IL-17, IL-1 $\beta$ , and TNF $\alpha$  proinflammatory cytokines in blood of VitD treated compared to VitD untreated patients. Statistical tests; Comparison was done using unpaired t-test or Mann-Whitney U test, depending on the skewness of the data. P value of <0.05 was considered significant.
